# Supplementary material for: Dynamic coupling of a hydration layer to a fluid phospholipid membrane: intermittency and multiple time-scale relaxations
Source: Royal Society of Chemistry journal article supplement (doi:10.1039/d0cp02803g), 2020-01-01
Supplement: d0cp02803g1.pdf [file d0cp02803g1.pdf]

# Dynamic coupling of hydration layer to a fluid phospholipid membrane: Intermittency and multiple time-scale relaxations

Abhinav Srivastava<sup>†\*</sup>, Sheeba Malik<sup>†\*</sup>, Smarajit Karmakar<sup>‡</sup> and Ananya Debnath<sup>†</sup>

<sup>†</sup>Department of Chemistry, Indian Institute of Technology Jodhpur, Rajasthan, 342037, India.

<sup>‡</sup>Centre for Interdisciplinary Sciences, Tata Institute of Fundamental Research, Hyderabad 500107, India.

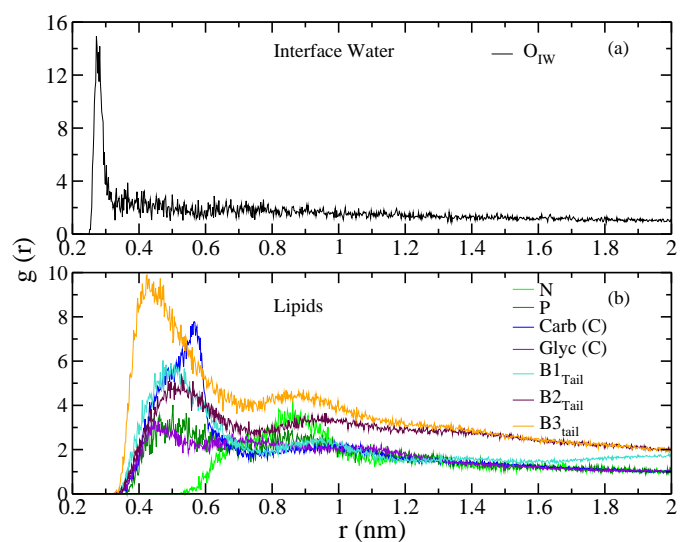

**Figure S1** RDF of a) oxygen-oxygen of IW, of b) lipid components from head to tail along the chain.

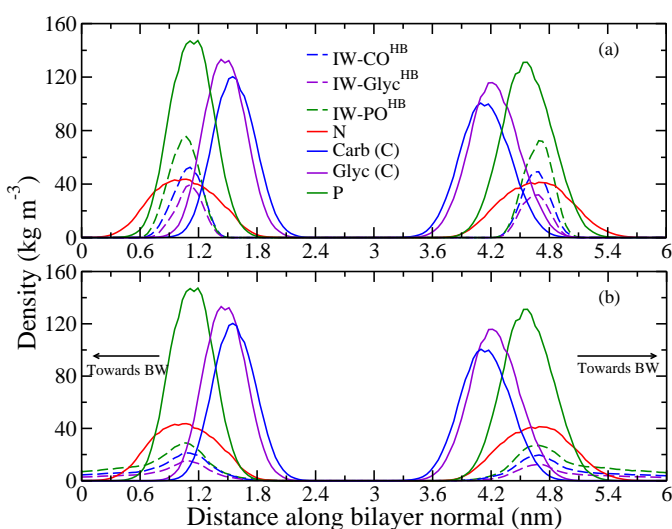

**Figure S2** Density profiles of different lipid head moieties and IW<sup>HB</sup> hydrogen bonded to those moieties along the bilayer normal. The profiles are averaged over 10 sets of a) 100 ps and b) 1 ns runlengths. Different classes of IW<sup>HB</sup> are confined close to the peak location of N and form hydrogen bonds to oxygens of P, Carb, Glyc. With time, the IW<sup>HB</sup> molecules diffuse towards bulk water (BW) region.

**Table S1** Time-scales when IW<sup>HB</sup> molecules enter sub-diffusive regime for 10 independent sets each with 1 ns run length.

| Beads                 | $t_1$ | $t_2$ | $t_3$ | $t_4$ | $t_5$ | $t_6$ | $t_7$ | $t_8$ | $t_9$ | $t_{10}$ |
|-----------------------|-------|-------|-------|-------|-------|-------|-------|-------|-------|----------|
|                       | (ps)     |
| IW <sup>HB</sup>      | 6.07  | 5.11  | 5.75  | 6.51  | 5.02  | 5.08  | 7.86  | 5.51  | 6.58  | 5.37     |
| IW-CO <sup>HB</sup>   | 6.94  | 5.93  | 6.22  | 7.06  | 5.71  | 5.56  | 8.56  | 5.68  | 6.70  | 6.03     |
| IW-Glyc <sup>HB</sup> | 6.26  | 5.22  | 6.05  | 8.11  | 5.60  | 5.89  | 10.70 | 5.87  | 6.74  | 6.11     |
| IW-PO <sup>HB</sup>   | 6.14  | 5.06  | 5.74  | 6.46  | 3.73  | 5.10  | 7.44  | 5.45  | 6.34  | 5.31     |

**Table S2** Time-scales when IW<sup>d</sup> molecules enter sub-diffusive regime for 10 independent sets each with 1 ns run length.

| Beads                | $t_1$ | $t_2$ | $t_3$ | $t_4$ | $t_5$ | $t_6$ | $t_7$ | $t_8$ | $t_9$ | $t_{10}$ |
|----------------------|-------|-------|-------|-------|-------|-------|-------|-------|-------|----------|
|                      | (ps)     |
| IW-CO <sup>d</sup>   | 12.61 | 10.90 | 11.62 | 12.98 | 11.78 | 9.69  | 10.63 | 13.36 | 12.42 | 12.83    |
| IW-Glyc <sup>d</sup> | 12.91 | 10.77 | 11.17 | 12.51 | 8.76  | 12.16 | 8.18  | 11.82 | 13.49 | 10.80    |
| IW-PO <sup>d</sup>   | 7.87  | 7.38  | 7.24  | 6.01  | 7.30  | 6.36  | 6.07  | 7.18  | 6.86  | 7.24     |
| IW-N <sup>d</sup>    | 6.51  | 5.78  | 5.45  | 4.96  | 6.37  | 5.71  | 5.32  | 6.00  | 5.48  | 5.91     |

**Table S3** Time-scales when DMPC beads enter sub-diffusive regime for 10 independent sets each with 1 ns run length.

| Beads                | $t_1$  | $t_2$ | $t_3$  | $t_4$  | $t_5$  | $t_6$  | $t_7$  | $t_8$  | $t_9$  | $t_{10}$ |
|----------------------|--------|-------|--------|--------|--------|--------|--------|--------|--------|----------|
|                      | (ps)   | (ps)  | (ps)   | (ps)   | (ps)   | (ps)   | (ps)   | (ps)   | (ps)   | (ps)     |
| Carb <sup>Head</sup> | 169.29 | 85.70 | 199.22 | 156.31 | 175.01 | 196.71 | 154.36 | 187.35 | 147.32 | 91.92    |
| Glyc <sup>Head</sup> | 180.70 | 97.43 | 218.87 | 165.34 | 289.77 | 217.72 | 177.55 | 199.95 | 164.09 | 302.62   |
| P <sup>Head</sup>    | 118.60 | 73.77 | 162.12 | 127.27 | 134.01 | 147.51 | 131.88 | 126.11 | 107.99 | 189.72   |
| N <sup>Head</sup>    | 73.04  | 89.92 | 83.45  | 83.44  | 77.28  | 88.29  | 81.30  | 80.22  | 69.70  | 86.81    |
| B1 <sup>Tail</sup>   | 73.19  | 87.14 | 77.66  | 77.66  | 71.82  | 83.90  | 71.04  | 84.10  | 73.52  | 93.25    |
| B2 <sup>Tail</sup>   | 18.93  | 19.38 | 18.65  | 18.65  | 19.59  | 19.26  | 18.79  | 19.02  | 19.63  | 18.01    |
| B3 <sup>Tail</sup>   | 2.97   | 3.11  | 2.86   | 2.86   | 2.93   | 2.82   | 2.84   | 2.96   | 2.90   | 3.07     |

**Table S4** Fitting parameters of SISFs of all classes of IW<sup>HB</sup> and BW calculated at  $\lambda = 0.6$  nm. Correlation coefficients were  $>0.99$ .

| Region                | $\tau_s$ | $f_Q$ | $\tau_\alpha$ | $\beta_\alpha$ | $f_{Q'}$ | $\tau_l$ | $\beta_l$ |
|-----------------------|----------|-------|---------------|----------------|----------|----------|-----------|
|                       | (ps)     |       | (ps)          |                |          | (ps)     |           |
| IW <sup>N</sup>       | 0.24     | 0.50  | 3.49          | 0.91           | 0.45     | 43.00    | 0.62      |
| IW-PO <sup>HB</sup>   | 0.21     | 0.41  | 3.40          | 0.93           | 0.58     | 24.42    | 0.51      |
| IW-CO <sup>HB</sup>   | 0.25     | 0.36  | 4.03          | 0.94           | 0.59     | 31.54    | 0.53      |
| IW-Glyc <sup>HB</sup> | 0.22     | 0.33  | 3.90          | 0.99           | 0.64     | 30.64    | 0.54      |
| BW                    | 0.10     | 0.90  | 3.54          | 0.94           |          |          |           |

**Table S5** Fitting parameters of SISFs of all classes of IW<sup>d</sup> calculated at  $\lambda = 0.6$  nm. Correlation coefficients were  $>0.99$ .

| Region               | $\tau_s$ | $f_Q$ | $\tau_\alpha$ | $\beta_\alpha$ | $f_{Q'}$ | $\tau_l$ | $\beta_l$ |
|----------------------|----------|-------|---------------|----------------|----------|----------|-----------|
|                      | (ps)     |       | (ps)          |                |          | (ps)     |           |
| IW-N <sup>d</sup>    | 0.2      | 0.53  | 3.59          | 0.89           | 0.42     | 44       | 0.64      |
| IW-PO <sup>d</sup>   | 0.28     | 0.52  | 5.0           | 0.76           | 0.41     | 62       | 0.64      |
| IW-Glyc <sup>d</sup> | 0.54     | 0.59  | 16.0          | 0.47           | 0.361    | 100      | 0.64      |
| IW-CO <sup>d</sup>   | 0.84     | 0.63  | 21.14         | 0.47           | 0.33     | 106.04   | 0.63      |

**Table S6** Fitting parameters of SISFs of all classes of  $IW^{HB}$  at  $\lambda = 0.3$  nm. Correlation coefficients were  $>0.99$ .

| Region         | $\tau_s$<br>(ps) | $f_Q$ | $\tau_\alpha$<br>(ps) | $\beta_\alpha$ | $f_{Q'}$ | $\tau_l$<br>(ps) | $\beta_l$ |
|----------------|------------------|-------|-----------------------|----------------|----------|------------------|-----------|
| $IW^{HB}$      | 0.16             | 0.46  | 1.07                  | 0.90           | 0.31     | 7.92             | 0.55      |
| $IW-PO^{HB}$   | 0.16             | 0.50  | 0.97                  | 0.85           | 0.30     | 8.02             | 0.51      |
| $IW-CO^{HB}$   | 0.19             | 0.42  | 0.90                  | 0.80           | 0.36     | 8.00             | 0.54      |
| $IW-Glyc^{HB}$ | 0.18             | 0.42  | 0.91                  | 0.82           | 0.36     | 8.23             | 0.54      |

**Table S7** Fitting parameters of SISFs of all classes of  $IW^d$  calculated at  $\lambda = 0.3$  nm. The fittings of  $\tau_s$  are comparatively poor to the ones at higher  $\lambda$  to obtain physically meaningful parameters. Correlation coefficients were  $>0.99$ .

| Region      | $\tau_s$<br>(ps) | $f_Q$ | $\tau_\alpha$<br>(ps) | $\beta_\alpha$ | $f_{Q'}$ | $\tau_l$<br>(ps) | $\beta_l$ |
|-------------|------------------|-------|-----------------------|----------------|----------|------------------|-----------|
| $IW-N^d$    | 0.20             | 0.52  | 1.097                 | 0.74           | 0.23     | 11.47            | 0.62      |
| $IW-PO^d$   | 0.22             | 0.51  | 1.50                  | 0.66           | 0.235    | 16.09            | 0.62      |
| $IW-Glyc^d$ | 0.27             | 0.63  | 2.419                 | 0.456          | 0.18     | 27.82            | 0.62      |
| $IW-CO^d$   | 0.30             | 0.80  | 3.90                  | 0.41           | 0.06     | 29.5             | 0.62      |

**Table S8** Scaling factors for fig. 13 (a) -(i)

|                                                  | Region | DMPC | $\lambda = 0.80$ nm |        | $\lambda = 0.60$ nm |        | $\lambda = 0.30$ nm |        |
|--------------------------------------------------|--------|------|---------------------|--------|---------------------|--------|---------------------|--------|
|                                                  |        |      | $IW^{HB}$           | $IW^d$ | $IW^{HB}$           | $IW^d$ | $IW^{HB}$           | $IW^d$ |
| (a)-(c)<br>$\tau_s$                              | N      | 1.00 | 1.00                | 1.00   | 1.14                | 1.00   | 1.00                | 1.00   |
|                                                  | P      | 1.08 | 1.10                | 2.21   | 1.10                | 1.40   | 1.10                | 1.10   |
|                                                  | Glyc   | 1.31 | 1.10                | 3.04   | 1.04                | 2.70   | 1.25                | 1.35   |
|                                                  | Carb   | 1.36 | 1.02                | 5.05   | 1.19                | 4.20   | 1.18                | 1.50   |
| (d)-(f)<br>$\tau_\alpha$                         | N      | 1.00 | 1.00                | 1.00   | 1.02                | 1.00   | 1.18                | 1.00   |
|                                                  | P      | 1.33 | 1.41                | 1.41   | 1.00                | 1.39   | 1.07                | 1.37   |
|                                                  | Glyc   | 1.93 | 1.33                | 3.02   | 1.14                | 4.45   | 1.01                | 2.21   |
|                                                  | Carb   | 2.04 | 1.24                | 7.71   | 1.18                | 5.96   | 1.00                | 3.57   |
| (g)-(i)<br>$\tau_\alpha$ (DMPC)<br>$\tau_l$ (IW) | N      | 1.00 | 1.00                | 1.00   | 1.76                | 1.00   | 1.18                | 1.00   |
|                                                  | P      | 1.33 | 1.04                | 1.40   | 1.00                | 1.40   | 1.01                | 1.40   |
|                                                  | Glyc   | 1.93 | 1.20                | 2.40   | 1.25                | 2.27   | 1.03                | 1.42   |
|                                                  | Carb   | 2.04 | 1.07                | 2.88   | 1.29                | 2.40   | 1.01                | 2.57   |

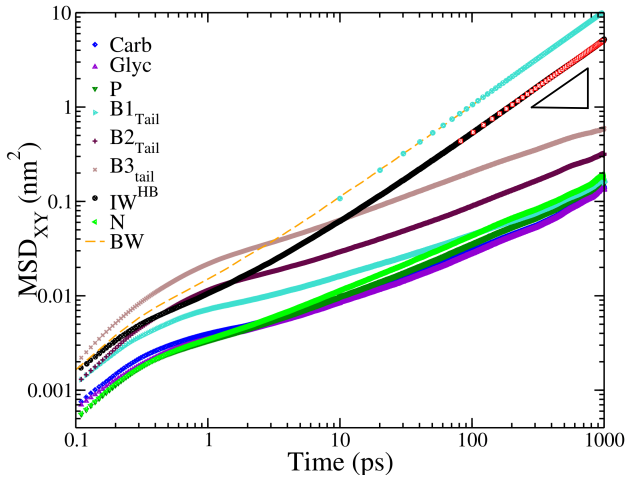

**Figure S3** Two dimensional translational mean square displacement ( $MSD_{XY}$ ) of all beads of DMPC,  $IW^{HB}$  and BW.

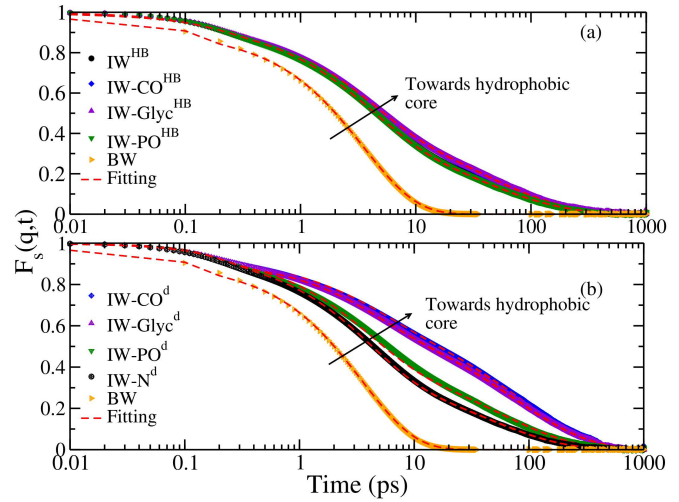

**Figure S5** SISF for all classes of a)  $IW^{HB}$ , b)  $IW^d$  at  $\lambda = 0.60\text{ nm}$ .  $IW-CO^d$  molecules buried deep in the hydrophobic core relax slowest.

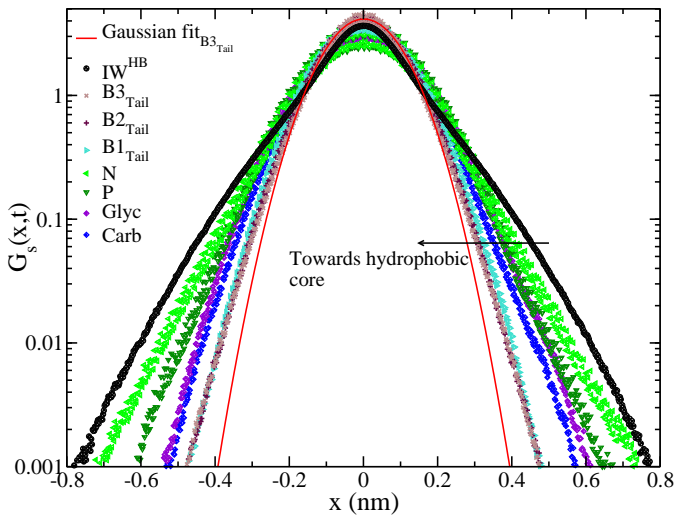

**Figure S4** One dimensional van Hove correlation function of DMPC beads and  $IW^{HB}$ . End beads of lipid tails have minimum deviations from Gaussianity.

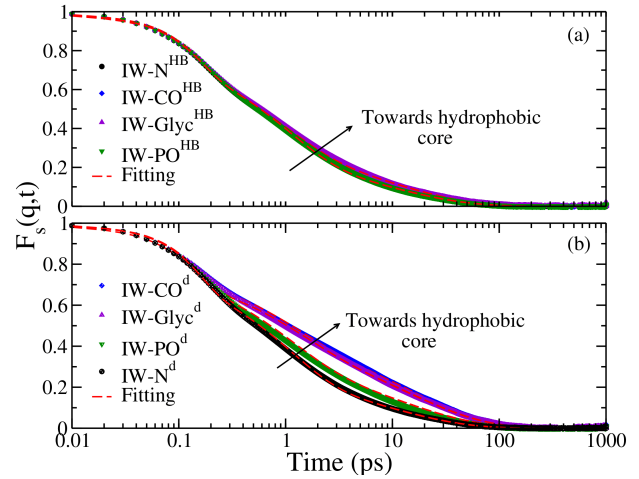

**Figure S6** SISF for all classes of a)  $IW^{HB}$ , b)  $IW^d$  at  $\lambda = 0.30\text{ nm}$ .  $IW-CO^d$  molecules buried deep in the hydrophobic core relax slowest.
